1 **The sodium leak channel NALCN encodes the major**  
2 **background sodium ion conductance in murine anterior**  
3 **pituitary cells**

4  
5 **Marziyeh Belal<sup>1&2\*</sup>, Mariusz Mucha<sup>1</sup>, Arnaud Monteil<sup>3</sup>, Paul G Winyard<sup>4</sup>,**  
6 **Robert Pawlak<sup>1</sup>, Jamie J. Walker<sup>5,6&7</sup>, Joel Tabak<sup>1\*</sup>, Mino D C Belle<sup>1\*</sup>.**

7  
8 <sup>1</sup> University of Exeter Medical School, Hatherly Labs, Streatham Campus,  
9 Prince of Wales Road, Exeter, Devon, UK.

10 <sup>2</sup> Northwestern University, Feinberg School of Medicine, Chicago, IL 60611,  
11 United States.

12 <sup>3</sup> IGF, University of Montpellier, CNRS, INSERM, Montpellier, France.

13 <sup>4</sup> University of Exeter Medical School, St Luke's Campus, Exeter EX1 2LU

14 <sup>5</sup> College of Engineering, Mathematics and Physical Sciences, University of  
15 Exeter, Exeter, UK.

16 <sup>6</sup> EPSRC Centre for Predictive Modelling in Healthcare, University of Exeter,  
17 Exeter, UK.

18 <sup>7</sup> Bristol Medical School, Translational Health Sciences, University of Bristol,  
19 Bristol, UK.

20

21

22 **Abstract**

23 The pituitary gland, the so-called “master gland” produces and secretes a  
24 variety of hormones essential for regulating growth and development, metabolic  
25 homeostasis, reproduction and the stress response. The interplay between the  
26 brain and peripheral feedback signals controls hormone secretion from pituitary  
27 cells by regulating the properties of ion channels, and in turn, cell excitability.  
28 Endocrine anterior pituitary cells fire spontaneous action potentials to regulate  
29 their intracellular calcium level and eventually hormone secretion. However, the  
30 molecular identity of the non-selective cationic leak channel involved in  
31 maintaining the resting membrane potential at the firing threshold remained  
32 unknown. Here, we show that the sodium leak channel NALCN, known to  
33 modulate neuronal excitability, also regulates excitability in murine anterior  
34 pituitary cells. Using viral transduction combined with electrophysiology and

35 calcium imaging we show that NALCN encodes the major  $\text{Na}^+$  leak  
36 conductance which tunes the resting membrane potential close to firing  
37 threshold to sustain the intrinsically-regulated firing in endocrine pituitary cells.  
38 Genetic interruption of NALCN channel activity, hyperpolarised the membrane  
39 potential drastically and stopped the firing activity and consequently abolished  
40 the cytosolic calcium oscillations. Moreover, we found that NALCN conductance  
41 forms a very small fraction of the total cell conductance yet has a profound  
42 impact on modulating pituitary cell excitability. Taken together, our results  
43 demonstrate that, NALCN is a crucial regulator of pituitary cell excitability and  
44 supports spontaneous firing activity to consequently regulate hormonal  
45 secretion. Our results suggest that receptor-mediated and potentially circadian  
46 changes in NALCN conductance can powerfully affect pituitary activity and  
47 hormone secretion.

48

49

## 50 **Introduction**

51

52 The electrical activity of cells, in response to external inputs or intrinsically  
53 derived stimulation, drives physiological functions that are essential to life, such  
54 as breathing, heartbeat, and hormone release (Cui et al, 2016; Protze et al,  
55 2017; Rorsman and Ashcroft, 2018; Bertram et al 2018). This electrical activity  
56 relies on depolarising conductances acting on the cellular membrane to  
57 maintain the resting membrane potential (RMP) near firing threshold, driving  
58 cells to discharge action potentials (APs). In hormone-secreting cells of the  
59 pituitary gland, spontaneous electrical activity results in rhythmic  $\text{Ca}^{2+}$  entry  
60 through voltage-gated calcium channels. The subsequent oscillations in  
61 cytosolic calcium concentration ( $[\text{Ca}^{2+}]_i$ ) serve a plethora of key physiological  
62 purposes, such as triggering hormone secretion, maintaining  $\text{Ca}^{2+}$  levels within  
63 intracellular calcium stores, and regulating gene expression (Mollard &  
64 Schlegel, 1996; Kwecien & Hammond, 1998; Stojilkovic, 2012). Silencing  
65 spontaneous firing in pituitary cells immediately abolishes  $[\text{Ca}^{2+}]_i$  oscillations  
66 and basal hormone secretion (Kucka et al, 2010).

67

68 The ability of pituitary cells to produce spontaneous APs is in part due to the  
69 depolarised RMP relative to the  $\text{K}^+$  equilibrium potential (Fletcher et al, 2018).

70 Replacing extracellular  $\text{Na}^+$  with large impermeable cations such as NMDG<sup>+</sup>  
71 immediately suppresses the cell's ability to become depolarised. Instead,  
72 hyperpolarises the RMP, silences firing activity and abolishes the  $[\text{Ca}^{2+}]_i$   
73 transients (Simasko, 1994; Sankaranarayan & Simasko, 1996; Kwiecien and  
74 Hammond, 1998; Tsaneva-Atanasova et al, 2007; Kucka et al, 2010, 2012;  
75 Tomic et al, 2011; Liang et al, 2011; Zemkova et al, 2016; Kayano et al, 2019).  
76 This reflects the presence of constitutively-active inward-depolarising currents in  
77 pituitary cells that set the membrane potential close to the firing threshold.  
78 Pharmacological and electrophysiological investigation of this inward leak  
79 current indicate that it is mediated by a TTX-insensitive, voltage-independent  
80 and constitutively active  $\text{Na}^+$ -permeable conductance (Fletcher et al, 2018).

81

82 Whilst the molecular identity of this resting  $\text{Na}^+$  conductance in pituitary cells  
83 remains unknown, the  $\text{Na}^+$  leak channel/nonselective (NALCN) has emerged as  
84 the major background  $\text{Na}^+$ -permeable conductance in several neuronal  
85 populations. For example, NALCN is essential for maintaining the spontaneous  
86 generation of action potentials in hippocampal neurons (Lu et al, 2007),  
87 GABAergic and dopaminergic neurons of the midbrain (Lutas et al, 2016;  
88 Philippart and Khaliq, 2018) and neurons of the suprachiasmatic nucleus of the  
89 hypothalamus (Flourakis et al, 2015). In ventral respiratory neurons of the brain  
90 stem, NALCN facilitates rhythmic and  $\text{CO}_2$  stimulated breathing, as well as  
91 responsiveness to neuropeptides (Lu et al, 2007; Shi et al, 2016; Yeh et al,  
92 2017).

93

94 The importance of NALCN as a regulator of electrical responsiveness in  
95 endocrine cells such as pancreatic  $\beta$  cells, is also emerging (Swayne et al  
96 2009). A high level of NALCN mRNA expression in the pituitary gland has been  
97 reported (Swayne et al, 2009). Further, transcriptomic data indicated that every  
98 anterior pituitary cell type significantly expresses NALCN and its known  
99 regulatory subunits (UNC-79, UNC-80, FAM155A) at levels higher than other  
100 known cationic leak channel, such as TRP channels and HCN channels (Paul  
101 Le Tissier, Jacques Drouin and Patrice Mollard, personal communication,  
102 04/2021). Moreover, NALCN has recently been shown to regulate cell  
103 excitability in a pituitary clonal cell line (Impheng et al, 2021). Finally, the  
104 pharmacological profile of NALCN in neurons is similar to that of resting  $\text{Na}^+$

105 conductance in pituitary cells: TTX-insensitive, extracellular  $\text{Ca}^{2+}$ - and NMDG<sup>+</sup>-  
106 sensitive.

107 Together, this strongly suggests that NALCN is the primary contributor to the  
108 background  $\text{Na}^+$  conductance and consequently plays a key role in regulating  
109 cell excitability in pituitary cells. To test this, we used a lentiviral-mediated  
110 knockdown strategy combined with electrophysiology and calcium imaging to  
111 evaluate the role of NALCN in regulating the electrical and  $[\text{Ca}^{2+}]_i$  activity of  
112 murine primary anterior pituitary cells. This multifaceted approach not only  
113 allowed us to determine that NALCN is the main contributor to the background  
114  $\text{Na}^+$ -permeable conductance of pituitary cells but also enabled us to estimate  
115 the magnitude of this conductance.

116

## 117 **Results**

118

### 119 **Primary murine anterior pituitary cells express NALCN channel protein**

120 Previous research revealed the expression of *Nalcn* gene in mouse anterior  
121 pituitary gland at the mRNA level (Swayne et al, 2009). Thus, we first confirmed  
122 the expression of NALCN protein in primary endocrine pituitary cells. Using  
123 fluorescence immunohistochemistry and the use of NALCN antibody directed at  
124 the extracellular epitope of NALCN protein, we could detect the presence of  
125 NALCN channel in murine endocrine anterior pituitary cells (Figure 1). Here, the  
126 majority of the anterior pituitary cells were stained with the NALCN antibody,  
127 and no staining was observed when the primary NALCN antibody was omitted  
128 (Figure 1H).

129

### 130 **NALCN regulates spontaneous firing of primary pituitary cells**

131 Given that gadolinium ( $\text{Gd}^{3+}$ ) and flufenamic acid (FFA) block the spontaneous  
132 firing of pituitary cells (Kucka et al, 2012) and thus revealing the presence of a  
133 functional non-selective cationic conductance (NSCC), it is noteworthy that  $\text{Gd}^{3+}$   
134 and FFA are not specific blockers of a particular non-selective cationic  
135 conductance. Thus, NSCCs other than NALCN may contribute to the effects of  
136 FFA and  $\text{Gd}^{3+}$  on membrane potential. To determine if NALCN is the main  
137 NSCC in endocrine anterior pituitary cells, we used a genetic manipulation  
138 approach to directly investigate the role of NALCN in the regulation of  
139 spontaneous firing in these cells. We set up a lentiviral-mediated knockdown

140 strategy to decrease NALCN expression level, and then evaluated the resulting  
141 changes in electrophysiological properties of pituitary cells.

142 Most untreated control (untreated Ctrl) and scramble control (SCR Ctrl) cells  
143 exhibited spontaneous firing activity (Figure 2A,B,D,F), consistent with the  
144 previous reports (*reviewed in* Fletcher et al, 2018). In contrast, 90% (28 of 31)  
145 of NALCN knockdown (NALCN KD) cells were found to be silent (Figure  
146 2C,D,F), compared to just 17% (5 of 30) in SCR control and 19% (6 of 31) in  
147 untreated control cells (Figure 2D,F). In addition, NALCN KD cells exhibited a  
148 significantly more hyperpolarised resting membrane potential (RMP) compared  
149 to both untreated and SCR control cells (NALCN KD RMP:  $-63.6 \pm 8.5$  mV  
150 (mean  $\pm$  SD),  $n=31$  from 12 animals; SCR Ctrl:  $-45.2$  mV  $\pm$  5.8 mV,  $n=30$ , 12  
151 animals; untreated Ctrl:  $-47.5$  mV  $\pm$  7.8,  $n=31$ , 12 animals;  $p<0.001$ , one-way  
152 ANOVA with post hoc Bonferroni correction; Figure 2E). There was no  
153 significant difference between the SCR control cells and untreated control cells  
154 either for the firing frequency (untreated Ctrl:  $0.7 \pm 0.6$  Hz,  $n=25$ ; SCR Ctrl:  $0.5 \pm$   
155  $0.4$  Hz,  $n=25$ ,  $p>0.1$ ,  $t$ -test; Figure 2F) or for the RMP value (untreated Ctrl: -  
156  $47.6 \pm 7.6$  mV,  $n=31$ ; SCR Ctrl:  $-45.2$  mV  $\pm$  5.8 mV,  $n=30$   $p>0.1$ ,  $t$ -test; Figure  
157 2E). Thus, the viral transduction *per se* did not affect the firing activity or RMP of  
158 pituitary cells. In the following sections we will therefore only compare NALCN  
159 KD cells with SCR control cells.

160

### 161 **Small conductance injection restores firing in NALCN KD cells**

162 We next use dynamic-clamp to examine whether the injection of nonselective  
163 cationic conductance to silent NALCN KD cells could restore spontaneous firing  
164 activity. Indeed, silent NALCN KD cells became active and gained their typical  
165 firing activity upon increasing the non-selective cationic conductance (Figure  
166 3A). The added conductance required to bring the NALCN KD cells to fire  
167 ranged from 0.02 to 0.12 nS (median 0.05 nS,  $n=28$ , Figure 3B).

168

169 Taken together, this first set of results indicates that NALCN is a key player in  
170 pituitary cell excitability, by modulating the RMP and subsequently the firing  
171 activity of primary pituitary cells. The amount of NALCN conductance lost by the  
172 cells after NALCN KD appears to be on the order of 0.05 nS.

173

174

175

176 **NALCN contributes to the inward Na<sup>+</sup> leak current in primary pituitary**  
177 **cells**

178 To further determine the contribution of the NALCN-mediated inward leak  
179 current to the background Na<sup>+</sup> current of pituitary cells, we compared the inward  
180 currents at a holding potential of -80 mV in SCR control and NALCN KD cells to  
181 remove any influence from K<sup>+</sup> channel conductance. The holding current  
182 obtained by voltage clamping cells at -80 mV was found to be significantly  
183 larger in the SCR control group compared to the NALCN KD group (Figure 4A-  
184 C, SCR control (mean ± SD): -0.72 ± 0.2 pA/pF, n=15; NALCN KD: -0.19 ± 0.13  
185 pA/pF, n=16; p< 0.001, *t*-test), confirming that the NALCN KD cells were more  
186 hyperpolarised. Remarkably, this background Na<sup>+</sup> conductance was reduced by  
187 0.045 nS in SCR control, but by only 0.015 nS in NALCN KD upon the  
188 substitution of extracellular Na<sup>+</sup> with the impermeant cation NMDG<sup>+</sup>. This  
189 indicates that the measured inward currents were mediated by a background  
190 Na<sup>+</sup> conductance which was more strongly reduced in NALCN KD cells (Figure  
191 4D, SCR control (median ± interquartile): 0.045 ± 0.02 nS, n = 16; NALCN KD:  
192 0.015 ± 0.01 nS, n = 15; p < 0.001, Mann Whitney test).

193

194 These findings indicate that NALCN contributes most of the inward leak  
195 conductance in pituitary cells. Moreover, we obtained a rough estimate of the  
196 contribution of NALCN channels to the background Na<sup>+</sup> conductance by noting  
197 that the difference in background Na<sup>+</sup> conductance between the SCR control  
198 and NALCN KD group is 0.045 – 0.015 = 0.03 nS. This is probably an  
199 underestimate since the NALCN KD may not have removed all the channels,  
200 but it implies that a change in background Na<sup>+</sup> conductance of just 0.03 nS can  
201 have a profound effect on the electrical activity of endocrine anterior pituitary  
202 cells. This is in agreement with the observation that adding 0.05 nS of inward  
203 leak conductance in NALCN KD cells restore electrical activity (Figure 3B).

204

205 **NALCN is required for spontaneous intracellular Ca<sup>2+</sup> oscillations in**  
206 **primary pituitary cells**

207 Previous studies have shown that the pattern of spontaneous firing determines  
208 the amplitude and duration of intracellular Ca<sup>2+</sup> oscillations in anterior endocrine  
209 pituitary cells (Stojilkovic et al, 2005, Stojilkovic et al, 2012). Thus, we next

210 tested whether NALCN KD affects spontaneous intracellular  $\text{Ca}^{2+}$  transients in  
211 these cells. Consistent with a previous report (Tomić et al, 2011), approximately  
212 57 % (51 of 90) of SCR control pituitary cells exhibited spontaneous intracellular  
213  $\text{Ca}^{2+}$  transients (Figure 5A). In contrast, only 11 % (4 of 36) of NALCN KD cells  
214 displayed low-amplitude intracellular  $\text{Ca}^{2+}$  transients, the remaining 89 % were  
215 quiescent and did not generate any intracellular  $\text{Ca}^{2+}$  oscillations. (Figure 5B).  
216 To quantitatively compare the size of the intracellular  $\text{Ca}^{2+}$  fluctuations between  
217 the SCR control and NALCN KD cells, the standard deviation of the  $\text{Ca}^{2+}$  trace  
218 for each individual cell was calculated over 600 seconds. Comparing the  
219 standard deviation between the two groups revealed a statistically-significant  
220 difference (Figure 5C, SCR control: median=0.04, n=90; NALCN KD:  
221 median=0.015, n=36;  $p < 0.001$ , Mann Whitney test). The final peak in each trace  
222 in Figure 5A,B represents the extracellular  $\text{K}^+$  (15 mM) induced depolarisation  
223 and consequently a rise in  $[\text{Ca}^{2+}]_i$ , which was used as a control for the viability  
224 of cells. This indicated that NALCN plays a role in regulating intracellular  $\text{Ca}^{2+}$   
225 oscillations of primary pituitary cells.

226

### 227 **NALCN mediates a low extracellular $\text{Ca}^{2+}$ -induced depolarisation in** 228 **primary pituitary cells**

229 In primary anterior pituitary cells, the lowering or removal of extracellular  $\text{Ca}^{2+}$   
230 causes membrane depolarisation and silencing of spontaneous firing activity but  
231 with no effect on  $[\text{Ca}^{2+}]_i$  (Stojilkovic, 2006; Sankaranarayanan and Simasko,  
232 1996; Kwiecien and Hammond, 1998; Tsaneva-Atanasova et al, 2007). The  
233 removal of extracellular  $\text{Ca}^{2+}$  in hippocampal neurons activates slow and  
234 sustained inward leak currents through the NSCC (Chu et al, 2003). It is  
235 reported that the removal of extracellular  $\text{Ca}^{2+}$  activates the UNC80-NALCN  
236 complex, increasing the NALCN current and thus regulating excitability in  
237 neurons (Lu et al, 2010). Therefore, we next explored the possibility that  
238 NALCN could be responsible for the low extracellular  $\text{Ca}^{2+}$ -induced  
239 depolarisation in pituitary cells. To test this hypothesis, the inward leak current  
240 was measured at a holding potential of -80 mV before and after reducing  
241 extracellular  $\text{Ca}^{2+}$  from 2 mM to 0.1 mM.

242

243 Consistent with previous studies in neurons, removal of extracellular  $\text{Ca}^{2+}$   
244 significantly increased the inward leak current in SCR control pituitary cells over



245 a time-course of 20 to 200 seconds (median  $\pm$  interquartile:  $-0.8 \pm 0.6$  pA/pF to  
246  $-1.5 \pm 0.5$  pA/pF,  $n = 15$ ,  $p < 0.001$ , Kruskal-Wallis, Figure 6A,C). Subsequent  
247 replacement of extracellular  $\text{Na}^+$  with NMDG<sup>+</sup> reduced the holding inward leak  
248 current ( $-1.5 \pm 0.5$  pA/pF to  $-0.3 \pm 0.2$  pA/pF,  $n = 15$ ,  $p < 0.001$ , Kruskal-Wallis,  
249 Figure 6A,C), indicating that the extracellular  $\text{Ca}^{2+}$ -induced depolarisation is  $\text{Na}^+$   
250 mediated. In contrast, lowering the extracellular  $\text{Ca}^{2+}$  in NALCN KD pituitary  
251 cells results in a small rise in the inward leak current ( $-0.37 \pm 0.35$  pA/pF to  
252  $-0.5 \pm 0.25$  pA/pF,  $n = 13$ ,  $p < 0.05$ , Figure 6B,C). The substitution of  
253 extracellular  $\text{Na}^+$  with NMDG<sup>+</sup> in NALCN KD cells still reduced the inward leak  
254 current but only marginally by comparison ( $-0.5 \pm 0.25$  pA/pF to  $-0.2 \pm 0.25$   
255 pA/pF,  $n = 13$ ,  $p < 0.01$ , Figure 6C), which reinforces the fact that NALCN is  
256 involved. This current could result from residual NALCN still expressed in the  
257 NALCN KD cells (since knocking down NALCN may not necessarily result in a  
258 100% knock out) or contribution from other NSCCs, or from the seal  
259 conductance.

260

261 The overall rise in the inward leak current after reducing extracellular  $\text{Ca}^{2+}$  in  
262 control pituitary cells was significantly higher than that in NALCN KD pituitary  
263 cells (median  $\pm$  interquartile in SCR control:  $-0.6 \pm 0.6$  pA/pF,  $n = 13$ , NALCN  
264 KD:  $-0.13 \pm 0.1$  pA/pF,  $n = 13$ ,  $p < 0.001$ , Mann Whitney test, Figure 6D). Our  
265 results show that, similarly to what has been observed in neurons, NALCN  
266 current is reduced by extracellular  $\text{Ca}^{2+}$  and is involved in the low  $\text{Ca}^{2+}$ -induced  
267 depolarisation observed in pituitary cells.

268

## 269 **Discussion**

270

### 271 **NALCN regulates the excitability of murine anterior pituitary cells**

272 All endocrine anterior pituitary cell types produce intrinsically-regulated firing.  
273 This firing is crucial for maintaining their normal physiology such as basal  
274 hormone secretion, gene expression and  $\text{Ca}^{2+}$  stores level (Kwiecien and  
275 Hammond, 1998; Stojilkovic et al, 2010; Fletcher et al, 2018). However, the  
276 molecular identity of the major non-selective cationic conductance (NSCC) that  
277 enables spontaneous firing in pituitary cells is not fully determined (Fletcher et  
278 al, 2018). Pharmacological studies have revealed that the NSCC is  
279 unequivocally  $\text{Na}^+$ -dependent and TTX-resistant (Simasko, 1994;



280 Sankaranarayanan and Simasko, 1996; Kucka et al, 2010; Liang et al, 2011;  
281 Tomic et al, 2011; Zemkova et al, 2016). Some studies have suggested that  
282 transient receptor cation channels (TRPC), as well as hyperpolarisation-  
283 activated cyclic nucleotide-gated channel (HCN) may contribute to the NSCC  
284 described in pituitary cells and related cell lines (Tomic et al, 2011; Kucka et al,  
285 2012; Kayano et al, 2019, Kretschmannova et al, 2012). However, these  
286 deductions were based on RNA expression profile as well as on the use of non-  
287 selective pharmacological compounds. In addition, no genetic manipulations  
288 (e.g. modification of the ion channel expression level) were performed to  
289 demonstrate their contribution to NSCC. A recent study, however, implicates  
290 NALCN as a major contributor to the NSCC in the GH3 pituitary cell line  
291 (Impheng et al, 2021).

292

293 To determine whether this finding extends to native pituitary cells, we applied  
294 genetic manipulation to knockdown NALCN channel, in combination with  
295 electrophysiology and calcium imaging to investigate its role in regulating cell  
296 excitability and  $[Ca^{2+}]_i$  oscillations in cultured murine anterior pituitary cells. We  
297 found that 1) NALCN channel encodes a major  $Na^+$  leak conductance to sustain  
298 the spontaneous firing activity in endocrine pituitary cells, 2) NALCN is the main  
299 contributor to the depolarising NSCC in pituitary cells, without which the cells  
300 remain silent and hyperpolarised. 3) NALCN is crucial for maintaining  
301 spontaneous intracellular  $Ca^{2+}$  transients in these cells. 4) As in neurons,  
302 NALCN activity is sensitive to the extracellular  $Ca^{2+}$  level in pituitary cells.  
303 Taken together, these results support a critical role for NALCN in both  
304 maintaining the spontaneous firing and the subsequent intracellular  $Ca^{2+}$   
305 transients in primary pituitary cells.

306

307 We found that NALCN KD pituitary cells are significantly hyperpolarised (by  
308 about 15 mV) compared to control pituitary cells. Moreover, 90% of NALCN KD  
309 pituitary cells were entirely silent and did not generate any action potentials.  
310 Interestingly, restoring the non-selective cationic conductance in NALCN KD  
311 cells using dynamic clamp made these cells generate action potentials in the  
312 normal frequency range for pituitary cells. However, discontinuing NALCN-like  
313 conductance injection (or dynamic-clamp mimic of NALCN conductance)  
314 immediately silenced the cells, retuning the membrane potential to the

315 hyperpolarised state. On the other hand, in the majority of silent control pituitary  
316 cells, the removal of the NALCN-like conductance did not return them to silent  
317 state but made them sustain the normal firing (data not shown).

318

### 319 **A small NALCN conductance sustains a large depolarising drive**

320 The comparison between background  $\text{Na}^+$  inward current in control cells and  
321 NALCN KD cells showed that the amount of NALCN conductance knocked  
322 down in our experiments was about 0.03 nS. This is consistent with the median  
323 0.05 nS background  $\text{Na}^+$  conductance required to activate silent NALCN KD  
324 cells. This dynamic clamp-based estimate does not rely on measurements of  
325 small noisy currents (a few pA) in voltage clamp, and therefore provides an  
326 estimate that is not affected by poor signal-to-noise ratio. The profound effect  
327 on electrical activity of such a small conductance results from the high input  
328 resistance of pituitary cells, on the order of 5 G $\Omega$ . Assuming a reversal potential  
329 around 0 mV for this conductance, at a membrane potential of -60 mV the  
330 current through a 0.05 nS NALCN conductance is 3 pA. If the membrane  
331 resistance is 5 G $\Omega$ , the depolarisation due to the current is therefore 15 mV.  
332 Again, this is consistent with our finding that NALCN KD cells were  
333 hyperpolarised by about 15 mV.

334

335 We have used the same knockdown approach as Impheng et al (2021), who  
336 have reported an estimated NALCN conductance of about 30 pS/pF in GH3  
337 cells. This represents a conductance about three times larger than our estimate  
338 in native pituitary cells (10 pS/pF, given our average pituitary cell capacitance of  
339 5 pF). We used a slightly higher extracellular concentration of  $\text{Mg}^{2+}$  than  
340 Impheng et al, 2021 (1 mM vs 0.8 mM). Given that divalent cations block  
341 NALCN (Chua et al 2020), this may explain part of the difference between our  
342 reported conductance values. It is also possible that GH3 cells simply express  
343 higher levels of NALCN. A limitation of this work is that we have not  
344 distinguished the different pituitary cell types we have recorded. Different cell  
345 types may express different average levels of NALCN. If such heterogeneity  
346 exists, then our estimate of NALCN conductance is an aggregate of the average  
347 NALCN conductance expressed by each cell-type we have sampled.

348

349 There is no available estimate for NALCN single-channel conductance, and we  
350 are probably under-estimating NALCN conductance in pituitary cells with a  
351 knockdown-based approach, since there may still be some NALCN channels  
352 expressed in the KD cells. Nevertheless, our estimate of 0.05 nS implies that  
353 cells have few active NALCN channels on their membrane. This would explain  
354 why our recordings of the non-specific cation current (Figure 4A, 6A), and  
355 others' (Liang et al 2011) are very noisy. Transient block by divalent cations,  
356 and possibly random channel gating, since NALCN has weak voltage sensitivity  
357 (Bouasse et al, 2019, Chua et al 2020), would result in relatively large current  
358 fluctuations if the number of channels is low.

359

### 360 **NALCN activity is modulated by extracellular $\text{Ca}^{2+}$ in pituitary cells**

361 Under both physiological and pathological circumstances extracellular  $\text{Ca}^{2+}$   
362 ( $[\text{Ca}^{2+}]_e$ ) can drop markedly in various brain regions (Ren, 2011) and serum  
363 (Ferry et al, 1997). This variation of serum  $\text{Ca}^{2+}$  appears to regulate  
364 adrenocorticotrophic hormone (ACTH) secretion from pituitary corticotrophs.  
365 Indeed, variations in serum  $\text{Ca}^{2+}$  within physiological range is associated with a  
366 drastic change in ACTH secretion (Isaac et al, 1984; Fuleihan et al, 1996). At  
367 the cellular level, the reduction in  $[\text{Ca}^{2+}]_e$  results in membrane depolarisation of  
368 cultured rat lactotrophs and somatotrophs (Sankaranarayanan and Simasko,  
369 1996; Tsaneva-Atanasova et al, 2007). Conversely, an increase in  $[\text{Ca}^{2+}]_e$ , but  
370 also in  $[\text{Mg}^{2+}]_e$ , to 10 mM with a concomitant blockade of calcium channel  
371 resulted in a hyperpolarisation of the membrane potential of cultured rat pituitary  
372 somatotrophs (Tsaneva-Atanasova et al, 2007). It has been speculated that the  
373 underlying mechanism of low  $[\text{Ca}^{2+}]_e$  – induced membrane depolarisation could  
374 involve either the inhibition of  $\text{Ca}^{2+}$ -activated potassium channels and/or the  
375 increase of a  $\text{Na}^+$  background conductance (Sankaranarayanan and Simasko,  
376 1996; Tsaneva-Atanasova et al, 2007).

377

378 NALCN was found to be sensitive to blockade by  $[\text{Ca}^{2+}]_e$  in neurons and GH3  
379 cells (Lu et al, 2010; Bouasse et al, 2019; Impheng et al, 2021). Our results  
380 show that in mice anterior pituitary cells, NALCN channels are also sensitive to  
381  $[\text{Ca}^{2+}]_e$  blockade, and mediate the low  $[\text{Ca}^{2+}]_e$ -induced membrane  
382 depolarisation. Two different mechanisms have been proposed to underlie  
383 NALCN blockade by  $[\text{Ca}^{2+}]_e$ . First, this blockade could occur through the  $\text{Ca}^{2+}$ -

384 sensing receptor (CaSR) *via* a G<sub>q</sub>-protein dependent pathway that ultimately  
385 induces NALCN phosphorylation by protein kinase C (Lu et al, 2010; Lee et al,  
386 2019). Alternatively, this blockade could occur through direct binding of Ca<sup>2+</sup>  
387 within the NALCN pore (Chua et al, 2020). It remains to determine which  
388 mechanism is involved in the NALCN modulation by [Ca<sup>2+</sup>]<sub>e</sub> in primary pituitary  
389 cells. Of note, Zemkova and colleagues reported that lowering [Ca<sup>2+</sup>]<sub>e</sub> had no  
390 effect on the membrane potential of corticotrophs (Zemkova et al, 2016) even  
391 though Letissier and colleagues found these cells express the NALCN-coding  
392 mRNA (personal communication). Possibly, the short amount of given time (20  
393 seconds) during which the [Ca<sup>2+</sup>]<sub>e</sub> was removed may not be long enough to  
394 allow the membrane potential to depolarise (Zemkova et al, 2016). In our  
395 experiments, the inward leak current in the majority of primary pituitary cells  
396 started to increase within 20 seconds to about a minute after removal of [Ca<sup>2+</sup>]<sub>e</sub>  
397 and continued to increase within the next few minutes until it reached a steady  
398 state. This timeline suggests that a transduction cascade instead of a direct  
399 pore effect could be involved.

400

#### 401 **NALCN modulation by neurohormones: a key player in pituitary cell** 402 **response to hypothalamic signals?**

403 In addition to Ca<sup>2+</sup> sensing, NALCN can be negatively and positively regulated  
404 by G-protein dependent and independent signalling pathways (Lu et al, 2009;  
405 Swayne et al, 2009; Philippart & Khaliq, 2018). We have seen above that a  
406 small NALCN conductance has a powerful effect on pituitary cell electrical  
407 excitability. Together, this suggest that NALCN modulation by hypothalamic  
408 signals would therefore provide a powerful way to control pituitary activity and  
409 regulate pituitary hormones secretion. Several studies have suggested that a  
410 NSCC is essential for facilitating pituitary cell response to hypothalamic signals.  
411 For instance, several groups have shown that hyperpolarising the cells by  
412 removing extracellular Na<sup>+</sup> supresses both growth hormone releasing hormone  
413 (GHRH)-induced Ca<sup>2+</sup> influx (Lussier et al, 1991; Naumov et al, 1994) and  
414 GHRH-induced growth hormone secretion from rat pituitary *in vitro* (Kato et al,  
415 1988). In the same study, it was found that TTX had no effect on either GHRH-  
416 induced GH secretion or GHRH-induced Ca<sup>2+</sup> influx (Kato et al, 1988).  
417 Interestingly, it was shown that in the absence of extracellular Na<sup>+</sup>, changing the  
418 resting membrane potential by increasing the extracellular K<sup>+</sup> to 15 or 30 mM

419 completely rescued the GHRH-induced GH secretion (Kato et al, 1988).  
420 Removal of extracellular Na<sup>+</sup> also substantially delayed the stimulatory  
421 response to corticotrophin-releasing hormone (CRH) by approximately 13  
422 minutes in murine corticotroph cells (Liang et al, 2011). Consistent with these  
423 observations, Tomić et al, (2011) found that after removal of bath Na<sup>+</sup>,  
424 stimulating adenylyl cyclase with forskolin (adenylyl cyclase and protein kinase  
425 A activator) does not rescue spontaneous [Ca<sup>2+</sup>]<sub>i</sub> transients in pituitary cells.  
426 These experiments suggest a critical role of NALCN in the response of pituitary  
427 cells to hypothalamic neurohormones. However, since these experiments  
428 essentially removed the depolarising component of NALCN, they cannot be  
429 used to assess whether NALCN is activated directly by neurohormones. In  
430 other words, the experiments cannot distinguish whether NALCN acts  
431 permissively to enable cells to respond to neurohormones or is directly involved  
432 in mediating the effects of the hormones. Thus, it could be of value to explore  
433 the impact of hypothalamic neurohormones on NALCN channel in each anterior  
434 pituitary cell type to identify the key effector ion channels involved in the  
435 regulation of pituitary hormone secretion.

436

437 The approach based on NALCN knockdown and electrophysiology developed  
438 here outlines a way to make this distinction. For example, NALCN depolarising  
439 current can be reintroduced using dynamic clamp in NALCN KD cells. In this  
440 way, while the native NALCN channel is prevented to directly mediate the action  
441 of neurohormones, its permissive action on membrane potential will be  
442 conserved. Alterations of cellular response to neurohormones under these  
443 circumstances imply that NALCN participates directly in receptor-mediated  
444 response to neurohormones.

445

## 446 **Perspectives**

447 Our data demonstrates that, as in neurons, NALCN is a crucial player in  
448 pituitary cell excitability by conducting a Ca<sup>2+</sup>-sensitive background Na<sup>+</sup>  
449 conductance that regulates membrane potential. Our data thus suggests that  
450 NALCN plays a key role in regulating hormone secretion from pituitary cells.  
451 Our approach of combining NALCN knockdown and dynamic clamp can now be  
452 used to determine whether NALCN directly participates in mediating pituitary  
453 responses to hypothalamic signals. The development of *Nalcn* knockout mouse

454 in a specific population of anterior pituitary cells is now required to examine the  
455 impact of NALCN on the different pituitary hormones.

456

457

458

459

460

## 461 **Materials and Methods**

462

### 463 **Primary cell culture**

464 Murine endocrine anterior pituitary cell cultures were prepared between 8:00  
465 and 11:00 AM from wild-type C57BL/6J mice as required. Mice were kept in  
466 groups of two to four under standard circumstances at the University of Exeter  
467 (UK) animal unit: Lights on at 6:00 AM, lights off at 6:00 PM at 21°C, tap water  
468 and food were available *ad libitum*. The adult mice aged between two to six  
469 months were selected randomly regardless of their sex. All the animal work was  
470 carried out according to the standards of the Home Office (England) and the  
471 University of Exeter. Three or four mice were culled via cervical dislocation and  
472 then were decapitated in accordance with Schedule 1 procedures. After  
473 removing the brain, the pituitary gland was removed from the sella turcica (bony  
474 cavity) and placed in a 100x21 mm culture dish (Thermo Fisher Scientific, UK)  
475 containing 150 µL 4°C DMEM (Dulbecco's modified Eagle's medium with high  
476 glucose and 25mM HEPES from Sigma Aldrich (Merck), UK) located on ice.  
477 Under a dissection microscope, the intermediate and posterior lobes were  
478 removed using a scalpel blade (size 10), and the anterior lobes were chopped  
479 to small pieces manually. Subsequently, the chopped tissues were transferred  
480 into a 50 mL falcon tube containing 2.5 mL DMEM supplemented with 207  
481 TAME Units/mL trypsin and 36 Kunitz Units/mL DNase I (both from Sigma  
482 Aldrich, UK), and then incubated in 37°C water bath for 10 minutes. Every 5  
483 minutes, the tube was swirled to disperse the tissue pieces evenly to achieve a  
484 thorough digestion. After 10 minutes, the suspension was gently triturated 20-30  
485 times using a 1 mL pipette tip. At the end of the digestion step, an inhibition  
486 solution containing 5 mL DMEM supplemented with 0.25 mg/mL Lima soybean  
487 trypsin inhibitor, 100 kallikrein unit aprotinin and 36 Kunitz Units/ml DNase I  
488 (Sigma Aldrich, UK) was added to the digestion solution, and the cell



489 suspension was left for a few minutes to inactivate the trypsin enzyme activity.  
490 The resulting suspension was finally filtered through a cell strainer with 70  $\mu\text{m}$   
491 nylon mesh (Merck) and was centrifuged at 100xg for 10 minutes. The pellet  
492 was resuspended in 500-600  $\mu\text{L}$  DMEM solution and then 60  $\mu\text{L}$  was plated on  
493 each 15 mm diameter round coverslip (Thermo Fisher Scientific, UK) in a 12-  
494 well plate. After 20 minutes, once the cells were securely attached to the bottom  
495 of coverslips, 1 mL of growth medium (DMEM + 2.5% FBS + 0.1 % Fibronectin  
496 + 1% antibiotic-penstrep, from Sigma Aldrich, UK) was added to each well and  
497 then incubated at 37°C in a 5% CO<sub>2</sub> incubator. The culture medium was  
498 replaced with antibiotic-free growth-medium 6 hours later. The growth medium  
499 was refreshed every two days. 5  $\mu\text{L}$  concentrated suspension of lentivirus was  
500 added to the medium in each well of a 12-well plate. Fresh growth medium was  
501 substituted 24 hours after transduction. Green fluorescence cells were usually  
502 observable 2-3 days after transduction and selected for electrophysiological  
503 recording. Each batch of primary pituitary cell culture was utilized for up to 5  
504 days after transduction for electrophysiological recordings and calcium imaging.

505

#### 506 **Lentivirus**

507 A microRNA-adapted shRNA based on miR-30 for specific NALCN silencing  
508 cloned in the lentiviral pGIPZ plasmid and targeting the 5'-  
509 GCAACAGACTGTGGCAATT-3' region of the rat NALCN-encoding RNA was  
510 obtained from a commercial source (Dharmacon #V2LMM\_90196). A non-  
511 silencing scramble control was used in our experiments (Dharmacon  
512 #RHS4346). HpaI/BamHI are the restriction sites in pGIPZ plasmid between  
513 which the NALCN silencing shRNA was inserted.

514

#### 515 **Electrophysiological recording**

516 Electrophysiological recordings from pituitary cells were performed at room  
517 temperature using single-cell amphotericin-perforated patch-clamp technique.  
518 The recordings were obtained using an Axopatch 700B amplifier and Clampex  
519 10.1 (Molecular Devices) with a sampling rate of 10 kHz and filtered at 2 kHz  
520 (lower pass). Patch pipettes were fabricated from borosilicate glass with  
521 filament (outer diameter: 1.50 mm and inner diameter: 0.86 mm, Warner  
522 Instrument-multi channel system distributor) and pulled using a micropipette  
523 puller (Sutter Instruments, model P-97). Pipette tips were then fire polished and



524 had a resistance ranging from 4 to 6 M $\Omega$ . Once a high resistance seal was  
525 formed (>10 G $\Omega$ ), usually within 10 minutes of patching, the access resistance  
526 (or series resistance) would reduce to less than 50 M $\Omega$ , and then recording  
527 started. If the seal resistance was less than 10 G $\Omega$ , the cell was discarded. In  
528 current clamp mode, series resistance was compensated by Bridge-Balance  
529 and was usually less than 40 M $\Omega$ . Junction potential was not corrected. In  
530 voltage clamp mode, compensated series resistance (60%) was normally less  
531 than 50 M $\Omega$  and the capacitance of recorded pituitary cells ranged between 4  
532 and 6 pF (electronic compensation was done *via* whole-cell mode of multiclamp  
533 700B). During recording, the cells were constantly perfused using a gravity-  
534 driven perfusion system, with a flow rate of 0.5 mL/min with extracellular  
535 solution containing (in millimolar) 138 NaCl, 5 KCl, 10 alpha-D-glucose, 25  
536 HEPES, 0.7 Na<sub>2</sub>HPO<sub>4</sub>, 1 MgCl<sub>2</sub> and 2 CaCl<sub>2</sub>. The pH was adjusted to 7.4 with  
537 NaOH, and the osmolality was 305 mOsmol/L. Patch pipettes were filled with an  
538 intracellular solution containing (in millimolar) 10 NaCl, 100 K-Gluconate, 50  
539 KCl, 10 HEPES, and 1 MgCl<sub>2</sub>. The pH was adjusted to 7.2 with KOH, 295  
540 mOsmol/L. The osmolality of the solutions was maintained by adding an inert  
541 ingredient sucrose. 5  $\mu$ l Amphotericin-B of a stock solution (20 mg/mL in  
542 dimethyl sulfoxide) was added to 1 mL of pipette solution to achieve a final  
543 concentration of 50  $\mu$ g/ml. Other concentrations such as 10  $\mu$ l Amphotericin-B  
544 were also tried, however 5  $\mu$ l resulted in more durability of the recording (all  
545 salts and Amphotericin-B were purchased from Sigma Aldrich.

546

### 547 **Dynamic clamp**

548 With dynamic clamp we can effectively change the biophysical property of ion  
549 channels (such as activation, inactivation, gating kinetics and conductances) as  
550 we choose and investigate how these manipulations affect the pattern of  
551 electrical activity in real time. In other words, we can establish the contribution  
552 of a type of ion channel to regulating various aspects of electrical activity  
553 (Milescu et al, 2008).

554

555 In this study, a second computer and an analogue-to-digital acquisition card  
556 (DAQ) were installed to run the dynamic clamp module in the software QuB  
557 (Milescu et al, 2008). In the current clamp mode of the Axopatch 700B amplifier,  
558 the membrane potential ( $V_m$ ) of a patched cell was recorded in real time and

559 passed to the computer running QuB as an input for a mathematical expression  
560 of non-selective cationic leak channels :  $I_{NS}=g_{NS} (V_m - E_{NS})$  which defines the  
561 corresponding current ( $I_{NS}$ ) going through them. The sodium leak conductance  
562 ( $g_{NS}$ ) was changed manually. The calculated  $I_{NS}$  was then injected back to the  
563 cell via the same DAQ and then the membrane voltage response was recorded.  
564 Thus, the injected NALCN-like current is varied dynamically, unlike conventional  
565 current clamp in which the injected current is constant across all time points.  
566 The reversal potential ( $E_{NS}$ ) for this channel was considered zero since this  
567 channel is permeable to different monovalent cations (e.g.  $K^+$  and  $Na^+$ ) but  
568 primarily to  $Na^+$  (Lu et al, 2007; Chua et al, 2020).

569

### 570 **Measurement of cytosolic calcium in single pituitary cells**

571 The coverslips with pituitary cells were bathed in the extracellular solution  
572 (containing same ingredients as described in the above electrophysiology  
573 section) with  $2\mu M$  fura-2 AM (Thermo Fischer Scientific-# F1221) for 45 minutes  
574 at  $37^\circ C$ . The cells were then rinsed three times with the extracellular solution  
575 using a 2 mL Pasteur pipette. Following this, the coverslips were mounted onto  
576 the recording chamber (volume  $\sim 0.2$  mL) on the stage of an inverted  
577 microscope (Nikon eclipse Ti). Cells were constantly perfused with the  
578 extracellular solution at room temperature using a gravity-driven perfusion  
579 system. Cells were excited every 1 second with alternating 340-nm and 380-nm  
580 light beams (20 millisecond exposure time) originating from a Lambda DG-4  
581 wavelength switcher (Sutter Instrument Company). Light intensity was reduced  
582 by 50% before hitting the cells using an appropriate filter. The intensity of  
583 emitted light was measured at 520 nm and images were acquired by a  
584 Hamamatsu digital camera C1344 set to  $4 \times 4$  binning. Hardware control was  
585 achieved by TI Workbench software developed by T. Inoue (As used by Tabak  
586 et al, 2010). Using this software, regions of interest (ROI) were selected around  
587 the cells that were not overlapping with other cells and a single background ROI  
588 was selected in an empty space. Pixel values within each region of interest  
589 were averaged for both 340 and 380 excitation wavelengths and then  
590 subtracted from the background. Following this, a ratio ( $r$ ) was computed  
591 according to the formula:

$$592 \quad r = (ROI_{340} - ROI_{background340}) / (ROI_{380} - ROI_{background380})$$

593 Trace analysis was performed in MATLAB.

594

## 595 **Immunohistochemistry**

596 Pituitary glands were extracted and fixed overnight in 4% PFA in PBS. The  
597 following day, 70  $\mu\text{m}$  thick sections were cut using a vibratome (Campden  
598 Instruments, UK), placed on poly-L-Lysine coated microscope slides (VWR) and  
599 left to dry. Next, the sections were blocked with 10% FBS in PBST (PBS  
600 containing 0.01% Triton X-100) for one hour at room temperature. Primary  
601 rabbit anti-NALCN antibody at 1:500 dilution (Alomone Labs, Israel, #ASC-022)  
602 in 10% FBS/PBST was applied to the sections and incubated in humid chamber  
603 at 4 C° degrees overnight. The next day, sections were washed 3 times for 15  
604 min with PBST. Then, the secondary 488-Alexa-Fluor conjugated antibody (at  
605 1:1000, Molecular Probes) was applied in 10% FBS/PBST solution for 1 hour at  
606 room temperature, followed by a series of three 15 min washes with PBST. The  
607 nucleic acids present in the pituitary gland cells were visualised with TOTO-3  
608 (1:2000, Thermo Fisher Scientific). Sections were incubated with TOTO-3 for 15  
609 min on an agitated surface, then washed three times (each time 10 min) and  
610 subsequently mounted with Fluorsave medium (Calbiochem). The controls were  
611 the sections where primary antibody was omitted. Images were obtained using  
612 a Zeiss LSM 5 Exciter confocal microscope run by Zen software.

613

## 614 **Statistics**

615 The type of statistical test used in each case is specified in the result using  
616 MATLAB.

617

618

619

620

621

622

623

624

625

626

627

628

629

630

631

632

633

634

635

636

637 **References**

638 Bertram, R., Satin, L.S., Sherman, A.S., 2018. Closing in on the Mechanisms of  
639 Pulsatile Insulin Secretion. *Diabetes* 67, 351–359. [https://doi.org/10.2337/dbi17-](https://doi.org/10.2337/dbi17-0004)  
640 0004

641 Bouasse, M., Impheng, H., Servant, Z., Lory, P., Monteil, A., 2019. Functional  
642 expression of CLIFAHDD and IHPRF pathogenic variants of the NALCN  
643 channel in neuronal cells reveals both gain- and loss-of-function properties. *Sci.*  
644 *Rep.* 9, 11791. <https://doi.org/10.1038/s41598-019-48071-x>

645 Chu, X., Zhu, X., Wei, W., Li, G., Simon, R.P., MacDonald, J.F., Xiong, Z.,  
646 2003. Acidosis decreases low Ca<sup>2+</sup>-induced neuronal excitation by inhibiting  
647 the activity of calcium-sensing cation channels in cultured mouse hippocampal  
648 neurons. *J. Physiol.* 550, 385–399. <https://doi.org/10.1113/jphysiol.2003.043091>

649 Chua, H.C., Wulf, M., Weidling, C., Rasmussen, L.P., Pless, S.A., 2020. The  
650 NALCN channel complex is voltage sensitive and directly modulated by  
651 extracellular calcium. *Sci. Adv.* 6, eaaz3154.  
652 <https://doi.org/10.1126/sciadv.aaz3154>

653 Cui, Y., Kam, K., Sherman, D., Janczewski, W.A., Zheng, Y., Feldman, J.L.,  
654 2016. Defining preBötzinger Complex Rhythm- and Pattern-Generating Neural  
655 Microcircuits In Vivo. *Neuron* 91, 602–614.  
656 <https://doi.org/10.1016/j.neuron.2016.07.003>

657 Ferry, S., Chatel, B., Dodd, R.H., Lair, C., Gully, D., Maffrand, J.-P., Ruat, M.,  
658 1997. Effects of Divalent Cations and of a Calcimimetic on Adrenocorticotrophic  
659 Hormone Release in Pituitary Tumor Cells. *Biochem. Biophys. Res. Commun.*  
660 238, 866–873. <https://doi.org/10.1006/bbrc.1997.7401>

661 Fletcher, P.A., Sherman, A., Stojilkovic, S.S., 2018. Common and diverse  
662 elements of ion channels and receptors underlying electrical activity in  
663 endocrine pituitary cells. *Mol. Cell. Endocrinol.* 463, 23–36.  
664 <https://doi.org/10.1016/j.mce.2017.06.022>

665 Flourakis, M., Kula-Eversole, E., Hutchison, A.L., Han, T.H., Aranda, K., Moose,  
666 D.L., White, K.P., Dinner, A.R., Lear, B.C., Ren, D., Diekman, C.O., Raman,  
667 I.M., Allada, R., 2015. A Conserved Bicycle Model for Circadian Clock Control  
668 of Membrane Excitability. *Cell* 162, 836–848.  
669 <https://doi.org/10.1016/j.cell.2015.07.036>

- 670 Fuleihan, G.E., Brown, E.M., Gleason, R., Scott, J., Adler, G.K., 1996. Calcium  
671 modulation of adrenocorticotropin levels in women--a clinical research center  
672 study. *J. Clin. Endocrinol. Metab.* 81, 932–936.  
673 <https://doi.org/10.1210/jcem.81.3.8772553>
- 674 Impheng, H., Lemmers, C., Bouasse, M., Legros, C., Pakaprot, N., Guérineau,  
675 N.C., Lory, P., Monteil, A., 2021. The sodium leak channel NALCN regulates  
676 cell excitability of pituitary endocrine cells. *FASEB J.* 35.  
677 <https://doi.org/10.1096/fj.202000841RR>
- 678 Isaac, R., Raymond, J.-P., Rainfray, M., Ardaillou, R., 1984. Effects of an acute  
679 calcium load on plasma ACTH, cortisol, aldosterone and renin activity in man.  
680 *Acta Endocrinol. (Copenh.)* 105, 251–257.  
681 <https://doi.org/10.1530/acta.0.1050251>
- 682 Kato, M., Hattori, M.A., Suzuki, M., 1988. Inhibition by extracellular Na<sup>+</sup>  
683 replacement of GRF-induced GH secretion from rat pituitary cells. *Am. J.*  
684 *Physiol.-Endocrinol. Metab.* 254, E476–E481.  
685 <https://doi.org/10.1152/ajpendo.1988.254.4.E476>
- 686 Kayano, T., Sasaki, Y., Kitamura, N., Harayama, N., Moriya, T., Dayanithi, G.,  
687 Verkhatsky, A., Shibuya, I., 2019. Persistent Na<sup>+</sup> influx drives L-type channel  
688 resting Ca<sup>2+</sup> entry in rat melanotrophs. *Cell Calcium* 79, 11–19.  
689 <https://doi.org/10.1016/j.ceca.2019.02.001>
- 690 Kretschmannova, K., Kucka, M., Gonzalez-Iglesias, A.E., Stojilkovic, S.S.,  
691 2012. The Expression and Role of Hyperpolarization-Activated and Cyclic  
692 Nucleotide-Gated Channels in Endocrine Anterior Pituitary Cells. *Mol.*  
693 *Endocrinol.* 26, 153–164. <https://doi.org/10.1210/me.2011-1207>
- 694 Kucka, M., Kretschmannova, K., Murano, T., Wu, C.-P., Zemkova, H.,  
695 Ambudkar, S.V., Stojilkovic, S.S., 2010. Dependence of Multidrug Resistance  
696 Protein-Mediated Cyclic Nucleotide Efflux on the Background Sodium  
697 Conductance. *Mol. Pharmacol.* 77, 270–279.  
698 <https://doi.org/10.1124/mol.109.059386>
- 699 Kučka, M., Kretschmannová, K., Stojilkovic, S.S., Zemková, H., Tomić, M.,  
700 2012. Dependence of Spontaneous Electrical Activity and Basal Prolactin  
701 Release on Nonselective Cation Channels in Pituitary Lactotrophs. *Physiol.*  
702 *Res.* 267–275. <https://doi.org/10.33549/physiolres.932301>
- 703 Kwicien, R., Hammond, C., 1998. Differential Management of Ca<sup>2+</sup> Oscillations  
704 by Anterior Pituitary Cells: A Comparative Overview. *Neuroendocrinology* 68,  
705 135–151. <https://doi.org/10.1159/000054360>
- 706 Lee, S.-Y., Vuong, T.A., Wen, X., Jeong, H.-J., So, H.-K., Kwon, I., Kang, J.-S.,  
707 Cho, H., 2019. Methylation determines the extracellular calcium sensitivity of  
708 the leak channel NALCN in hippocampal dentate granule cells. *Exp. Mol. Med.*  
709 51, 1–14. <https://doi.org/10.1038/s12276-019-0325-0>
- 710 Liang, Z., Chen, L., McClafferty, H., Lukowski, R., MacGregor, D., King, J.T.,  
711 Rizzi, S., Sausbier, M., McCobb, D.P., Knaus, H., Ruth, P., Shipston, M.J.,  
712 2011. Control of hypothalamic–pituitary–adrenal stress axis activity by the

- 713 intermediate conductance calcium-activated potassium channel, SK4. J.  
714 *Physiol.* 589, 5965–5986. <https://doi.org/10.1113/jphysiol.2011.219378>
- 715 Lu, B., Su, Y., Das, S., Liu, J., Xia, J., Ren, D., 2007. The Neuronal Channel  
716 NALCN Contributes Resting Sodium Permeability and Is Required for Normal  
717 Respiratory Rhythm. *Cell* 129, 371–383.  
718 <https://doi.org/10.1016/j.cell.2007.02.041>
- 719 Lu, B., Zhang, Q., Wang, H., Wang, Y., Nakayama, M., Ren, D., 2010.  
720 Extracellular Calcium Controls Background Current and Neuronal Excitability  
721 via an UNC79-UNC80-NALCN Cation Channel Complex. *Neuron* 68, 488–499.  
722 <https://doi.org/10.1016/j.neuron.2010.09.014>
- 723 Lussier, B.T., French, M.B., Moor, B.C., Kraicer, J., 1991. Free Intracellular  
724 Ca<sup>2+</sup> Concentration and Growth Hormone (GH) Release from Purified Rat  
725 Somatotrophs, III. Mechanism of Action of GH-Releasing Factor and  
726 Somatostatin\*. *Endocrinology* 128, 592–603. [https://doi.org/10.1210/endo-128-](https://doi.org/10.1210/endo-128-1-592)  
727 1-592
- 728 Lutas, A., Lahmann, C., Soumillon, M., Yellen, G., 2016. The leak channel  
729 NALCN controls tonic firing and glycolytic sensitivity of substantia nigra pars  
730 reticulata neurons. *eLife* 5, e15271. <https://doi.org/10.7554/eLife.15271>
- 731 Mollard, P., Schlegel, W., 1996. Why are endocrine pituitary cells excitable?  
732 *Trends Endocrinol. Metab.* 7, 361–365. [https://doi.org/10.1016/S1043-](https://doi.org/10.1016/S1043-2760(96)00186-5)  
733 2760(96)00186-5
- 734 Naumov, A.P., Herrington, J., Hille, B., 1994. Actions of growth-hormone-  
735 releasing hormone on rat pituitary cells: intracellular calcium and ionic currents.  
736 *Pflugers Arch. Eur. J. Physiol.* 427, 414–421.  
737 <https://doi.org/10.1007/BF00374255>
- 738 Philippart, F., Khaliq, Z.M., 2018. Gi/o protein-coupled receptors in dopamine  
739 neurons inhibit the sodium leak channel NALCN. *eLife* 7, e40984.  
740 <https://doi.org/10.7554/eLife.40984>
- 741 Protze, S.I., Liu, J., Nussinovitch, U., Ohana, L., Backx, P.H., Gepstein, L.,  
742 Keller, G.M., 2017. Sinoatrial node cardiomyocytes derived from human  
743 pluripotent cells function as a biological pacemaker. *Nat. Biotechnol.* 35, 56–68.  
744 <https://doi.org/10.1038/nbt.3745>
- 745 Ren, D., 2011. Sodium Leak Channels in Neuronal Excitability and Rhythmic  
746 Behaviors. *Neuron* 72, 899–911. <https://doi.org/10.1016/j.neuron.2011.12.007>
- 747 Rorsman, P., Ashcroft, F.M., 2018. Pancreatic  $\beta$ -Cell Electrical Activity and  
748 Insulin Secretion: Of Mice and Men. *Physiol. Rev.* 98, 117–214.  
749 <https://doi.org/10.1152/physrev.00008.2017>
- 750 Sankaranarayanan, S., Simasko, S.M., 1996. A role for a background sodium  
751 current in spontaneous action potentials and secretion from rat lactotrophs. *Am.*  
752 *J. Physiol.-Cell Physiol.* 271, C1927–C1934.  
753 <https://doi.org/10.1152/ajpcell.1996.271.6.C1927>



- 754 Shi, Y., Abe, C., Holloway, B.B., Shu, S., Kumar, N.N., Weaver, J.L., Sen, J.,  
755 Perez-Reyes, E., Stornetta, R.L., Guyenet, P.G., Bayliss, D.A., 2016. Nalcn Is a  
756 “Leak” Sodium Channel That Regulates Excitability of Brainstem  
757 Chemosensory Neurons and Breathing. *J. Neurosci.* 36, 8174–8187.  
758 <https://doi.org/10.1523/JNEUROSCI.1096-16.2016>
- 759 Simasko, S.M., 1994. A background sodium conductance is necessary for  
760 spontaneous depolarizations in rat pituitary cell line GH3. *Am. J. Physiol.-Cell*  
761 *Physiol.* 266, C709–C719. <https://doi.org/10.1152/ajpcell.1994.266.3.C709>
- 762 Stojilkovic, S.S., 2006. Pituitary cell type-specific electrical activity, calcium  
763 signaling and secretion. *Biol. Res.* 39. [https://doi.org/10.4067/S0716-](https://doi.org/10.4067/S0716-97602006000300004)  
764 [97602006000300004](https://doi.org/10.4067/S0716-97602006000300004)
- 765 Stojilkovic, S.S., Kretschmannova, K., Tomić, M., Stratakis, C.A., 2012.  
766 Dependence of the Excitability of Pituitary Cells on Cyclic Nucleotides: Cyclic  
767 nucleotides and excitability of pituitary cells. *J. Neuroendocrinol.* 24, 1183–  
768 1200. <https://doi.org/10.1111/j.1365-2826.2012.02335.x>
- 769 Stojilkovic, S.S., Tabak, J., Bertram, R., 2010. Ion Channels and Signaling in  
770 the Pituitary Gland. *Endocr. Rev.* 31, 845–915. [https://doi.org/10.1210/er.2010-](https://doi.org/10.1210/er.2010-0005)  
771 [0005](https://doi.org/10.1210/er.2010-0005)
- 772 Stojilkovic, S.S., Zemkova, H., Van Goor, F., 2005. Biophysical basis of pituitary  
773 cell type-specific Ca<sup>2+</sup> signaling–secretion coupling. *Trends Endocrinol. Metab.*  
774 16, 152–159. <https://doi.org/10.1016/j.tem.2005.03.003>
- 775 Swayne, L.A., Mezghrani, A., Varrault, A., Chemin, J., Bertrand, G., Dalle, S.,  
776 Bourinet, E., Lory, P., Miller, R.J., Nargeot, J., Monteil, A., 2009. The NALCN  
777 ion channel is activated by M3 muscarinic receptors in a pancreatic  $\beta$ -cell line.  
778 *EMBO Rep.* 10, 873–880. <https://doi.org/10.1038/embor.2009.125>
- 779 Tomić, M., Kucka, M., Kretschmannova, K., Li, S., Nesterova, M., Stratakis,  
780 C.A., Stojilkovic, S.S., 2011. Role of nonselective cation channels in  
781 spontaneous and protein kinase A-stimulated calcium signaling in pituitary cells.  
782 *Am. J. Physiol.-Endocrinol. Metab.* 301, E370–E379.  
783 <https://doi.org/10.1152/ajpendo.00130.2011>
- 784 Tsaneva-Atanasova, K., Sherman, A., van Goor, F., Stojilkovic, S.S., 2007.  
785 Mechanism of Spontaneous and Receptor-Controlled Electrical Activity in  
786 Pituitary Somatotrophs: Experiments and Theory. *J. Neurophysiol.* 98, 131–144.  
787 <https://doi.org/10.1152/jn.00872.2006>
- 788 Vela, J., Pérez-Millán, M.I., Becu-Villalobos, D., Díaz-Torga, G., 2007. Different  
789 kinases regulate activation of voltage-dependent calcium channels by  
790 depolarization in GH3 cells. *Am. J. Physiol.-Cell Physiol.* 293, C951–C959.  
791 <https://doi.org/10.1152/ajpcell.00429.2006>
- 792 Yeh, S.-Y., Huang, W.-H., Wang, W., Ward, C.S., Chao, E.S., Wu, Z., Tang, B.,  
793 Tang, J., Sun, J.J., Esther van der Heijden, M., Gray, P.A., Xue, M., Ray, R.S.,  
794 Ren, D., Zoghbi, H.Y., 2017. Respiratory Network Stability and Modulatory  
795 Response to Substance P Require Nalcn. *Neuron* 94, 294-303.e4.  
796 <https://doi.org/10.1016/j.neuron.2017.03.024>



797 Zemkova, H., Tomić, M., Kucka, M., Aguilera, G., Stojilkovic, S.S., 2016.  
798 Spontaneous and CRH-Induced Excitability and Calcium Signaling in Mice  
799 Corticotrophs Involves Sodium, Calcium, and Cation-Conducting Channels.  
800 *Endocrinology* 157, 1576–1589. <https://doi.org/10.1210/en.2015-1899>

801

802 **Figure 1**

803

804

805

806

807

808

809

810

811

812

813

814

815

816

817

818

819

820

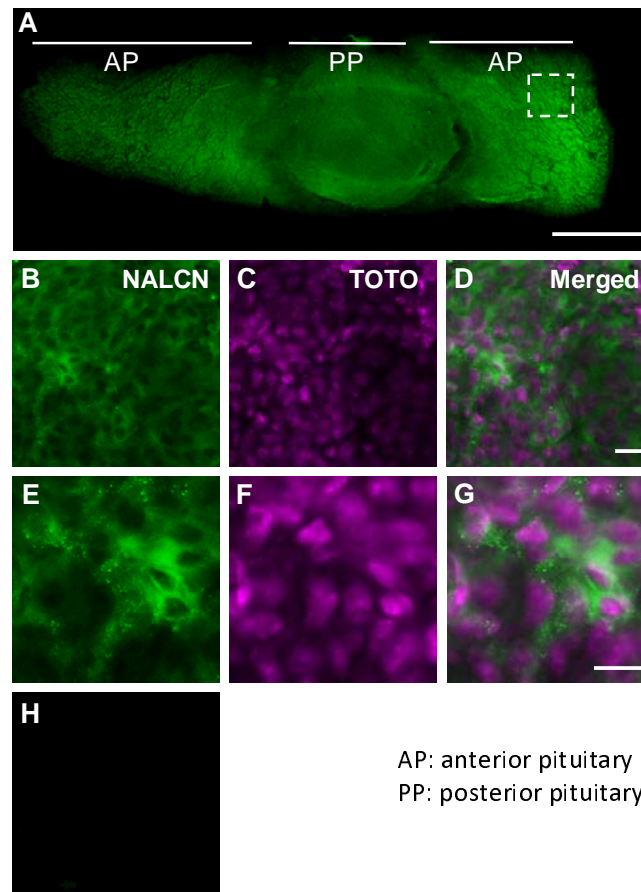

821 **Figure 1. The NALCN ion channel is expressed in mouse pituitary gland.**

822 Immunofluorescence staining revealed the presence of NALCN protein in  
823 mouse pituitary gland (n=3). NALCN is shown in green. TOTO-3 (shown in  
824 magenta) was used to visualise cellular nucleic acids. **A)** Transverse section of  
825 a pituitary gland under 10X magnification excited with 488 nm light to detect  
826 NALCN immunofluorescence. **B)** NALCN visualisation in the area defined by  
827 dashed square in A. **C)** TOTO-labelled nucleic acid in the same area. **D)** Merged  
828 image from B and C. B, C and D are under 20X magnification. **E-G)** are under  
829 higher digital magnification using confocal microscopy. **H)** Negative control  
830 tissue for which the primary anti NALCN antibody was omitted. The scale bars  
831 indicate 500  $\mu$ m in panel A, and 20  $\mu$ m in panels D and G.

832

833

834

835

836

## 837 Figure 2

838

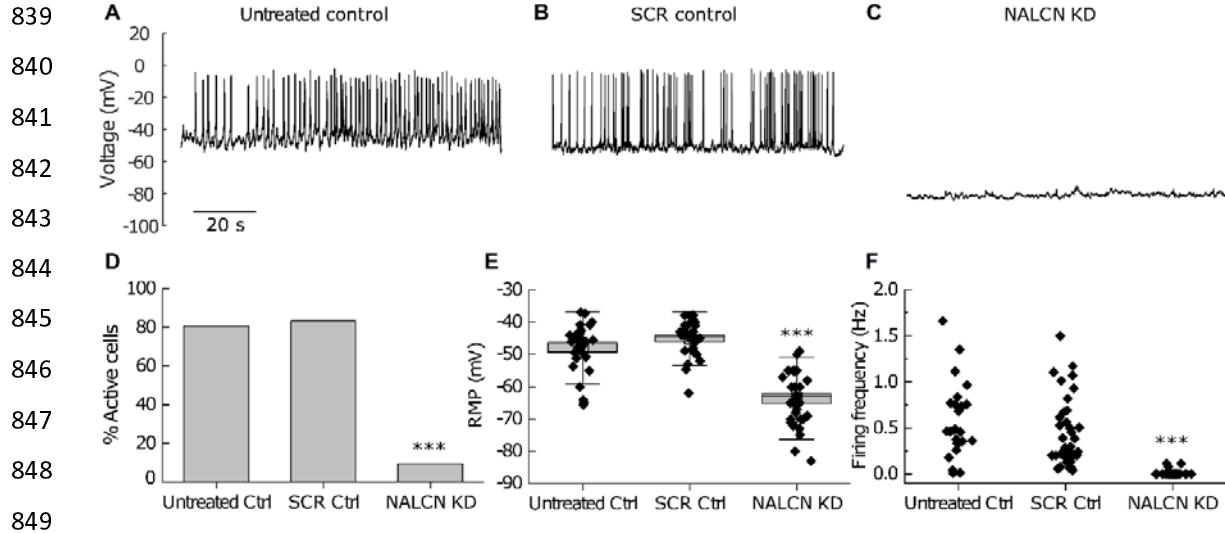

850 **Figure 2. Knock-down of NALCN silences electrical activity of primary**  
851 **murine pituitary cells.** Representative traces of spontaneous firing activity  
852 from **A)** an untreated and **B)** a scramble control (SCR Ctrl) pituitary cell. **C)**  
853 Representative trace of electrical activity in a NALCN knockdown (NALCN KD)  
854 pituitary cell. **D)** Percentages of active and silent cells in untreated control, SCR  
855 Ctrl and NALCN KD pituitary cells. **E)** Resting membrane potential of untreated  
856 control, SCR Ctrl and NALCN KD pituitary cells (data presented as mean  $\pm$  SD,  
857 untreated control:  $-47.6 \pm 7.6$  mV,  $n=31$  vs SCR control:  $-45$  mV  $\pm$  5.8 mV,  
858  $n=30$ ,  $p>0.1$ ; NALCN KD:  $-63.6 \pm 8.5$  mV,  $n=31$  vs SCR Ctrl and untreated  
859 control:  $p < 0.001$ , one-way ANOVA with Bonferroni correction), the box  
860 represents the standard error, the whiskers represent standard deviation (SD).  
861 **F)** Distribution of firing frequency between untreated Ctrl, SCR Ctrl and NALCN  
862 KD cells over a course of 600 seconds (data presented as mean  $\pm$  SD, NALCN  
863 KD: 0 Hz,  $n= 31$  vs SCR Ctrl:  $0.5 \pm 0.4$  Hz,  $n= 25$  and vs untreated Ctrl:  $0.7 \pm$   
864  $0.6$  Hz,  $n= 25$ ,  $p < 0.001$ ; SCR Ctrl vs untreated Ctrl:  $p > 0.1$ , one-way ANOVA  
865 with Bonferroni correction). Only three out of 31 NALCN KD cells exhibited firing  
866 activity, which occurred at a lower frequency ( $0.1 \pm 0.02$  Hz) relative to the

867 untreated and SCR controls. In each graph, triple asterisks (\*\*\*) represents  $p <$   
868 0.001.

869

870

871

872

### 873 **Figure 3**

874

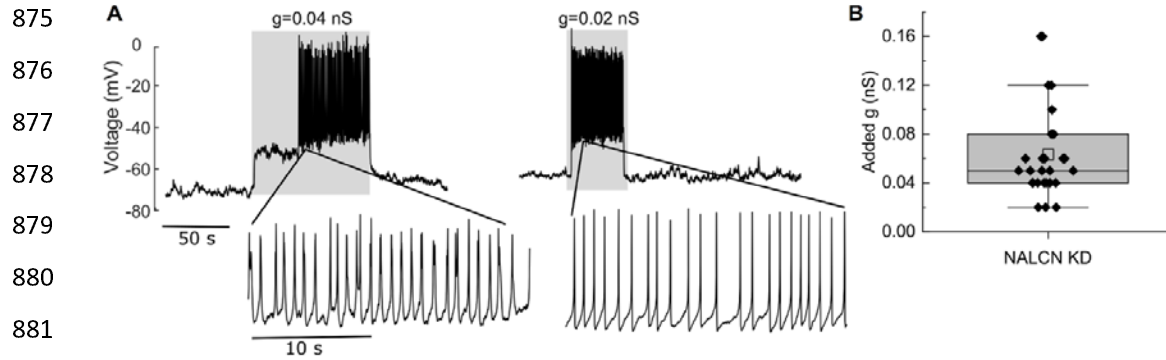

883 **Figure 3. Addition of nonselective cationic conductance restores firing**  
884 **activity in silent NALCN KD pituitary cells. A)** Two representative voltage  
885 traces of silent NALCN Knock-down (NALCN KD) pituitary cells. Firing activity  
886 was restored once the nonselective cationic conductance ( $g$ ) was increased by  
887 a very minute amount, such as 0.02 (right panel, the cell started silent and then  
888 discharges APs mid-way) or 0.04 nS (left panel). The cells immediately returned  
889 to a silent and hyperpolarised state after removal of the added conductance. **B)**  
890 The distribution of added conductance ( $g$ ) values required for restoring the firing  
891 activity in NALCN KD pituitary cells. Median: 0.05 nS,  $n=28$ .

892

893

894

895

896

897

898

899

900

901

902

903

904

905

906

907

908

909 **Figure 4**

910

911

912

913

914

915

916

917

918

919

920

921

922

923

924

925

926

927

928

929

930

931 **Figure 4. NALCN contributes most of the inward  $\text{Na}^+$  leak conductance in**  
932 **endocrine anterior pituitary cells. A)** Representative trace of an inward  $\text{Na}^+$   
933 leak current ( $V_h = -80$  mV) in a SCR Ctrl pituitary cell as revealed by the  
934 substitution of extracellular  $\text{Na}^+$  with NMDG<sup>+</sup>. **B)** Representative trace of an  
935 inward leak current in a NALCN KD pituitary cell as revealed by the substitution  
936 of extracellular  $\text{Na}^+$  with NMDG<sup>+</sup>. **C)** The density of the inward  $\text{Na}^+$  leak current

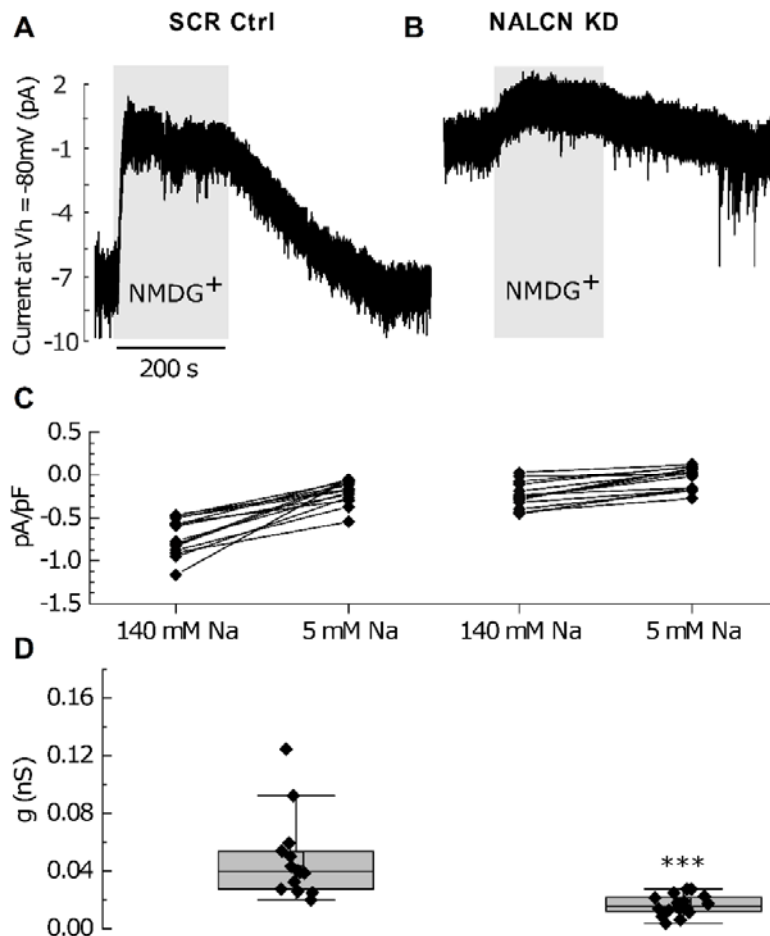

937 in NALCN KD cells was significantly reduced compared to SCR Ctrl (data  
938 presented as mean  $\pm$  SD, SCR Ctrl:  $-0.72 \pm 0.2$  pA/pF ( $-5.2 \pm 1.9$  pA),  $n=15$ ;  
939 NALCN KD:  $-0.19 \pm 0.13$  pA/pF ( $-1.5 \pm 0.9$  pA),  $n=16$ ;  $p < 0.001$ ,  $t$ -test). **D)** The  
940 background  $\text{Na}^+$  conductance was more strongly reduced by  $\text{Na}^+$  removal in  
941 control cells than in NALCN KD cells (data represented as Median  $\pm$   
942 interquartile, SCR control:  $0.045 \pm 0.02$  nS,  $n = 16$ ; NALCN KD:  $0.015 \pm 0.01$  nS  
943 ,  $n = 15$ ;  $p < 0.001$ , Mann Whitney test).

944

## 945 Figure 5

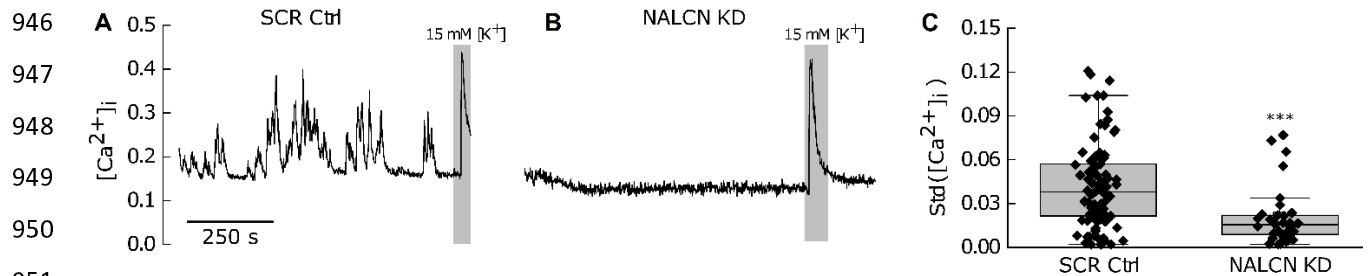

## 952 Figure 5. NALCN KD impacts on intracellular Ca<sup>2+</sup> transients.

953 **A)** Representative trace of intracellular Ca<sup>2+</sup> oscillations in an SCR control  
954 pituitary cell. The final peak in each graph represents the extracellular K<sup>+</sup> (15  
955 mM)-induced rise in [Ca<sup>2+</sup>]<sub>i</sub>, which was used to check cell viability. **B)** A  
956 representative trace of [Ca<sup>2+</sup>]<sub>i</sub> in a NALCN KD pituitary cell. **C)** The standard  
957 deviation of each [Ca<sup>2+</sup>]<sub>i</sub> trace was calculated and statistical analysis revealed a  
958 significant alteration of [Ca<sup>2+</sup>]<sub>i</sub> oscillations between the two groups (SCR Ctrl:  
959 median= 0.04,  $n = 90$  from 4 mice; NALCN KD: median= 0.015,  $n = 36$  from 4  
960 mice;  $p < 0.001$ , Mann Whitney test). Box: inter-quartile, Whiskers: range,  
961 excluding outliers, Central line: median.

962

963

964

965

966

967

968

969

970

971

972

973

974

975

976

977 **Figure 6**

978

979

980

981

982

983

984

985

986

987

988

989

990

991

992

993

994

995

996

997

998

999

1000 **Figure 6. NALCN is sensitive to the changes in extracellular  $\text{Ca}^{2+}$  level. A)**  
1001 Representative trace of inward leak current in a SCR control pituitary cell.  
1002 Reducing extracellular  $\text{Ca}^{2+}$  significantly increased the inward leak current over  
1003 a time-course of 20 to 200 seconds (b). Subsequent replacement of  
1004 extracellular  $\text{Na}^+$  with NMDG $^+$  strongly reduced the holding inward leak current  
1005 (c). **B)** Representative trace of the inward leak current in a NALCN KD pituitary  
1006 cell; lowering the extracellular  $\text{Ca}^{2+}$  resulted in a small rise in the inward leak

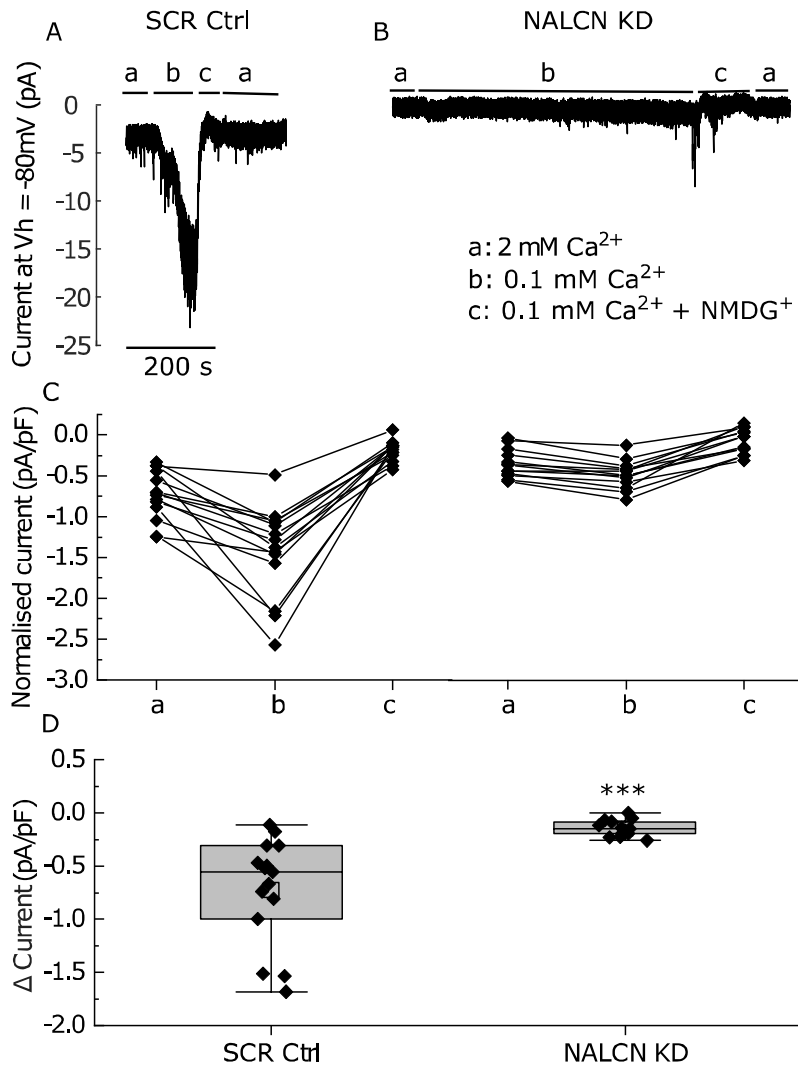

1007 current (b, applied for a longer time to rule out any further change in current).  
1008 Subsequent replacement of extracellular  $\text{Na}^+$  with  $\text{NMDG}^+$  reduced this inward  
1009 current (c). **C**) Normalised inward leak current in 2mM  $\text{Ca}^{2+}$  (a), 0.1 mM  $\text{Ca}^{2+}$   
1010 (b), and 0.1 mM  $\text{Ca}^{2+}$  +  $\text{NMDG}^+$  (c) in SCR control (left) and NALCN KD cells  
1011 (right). **D**) The overall rise in inward leak current after reducing extracellular  
1012  $\text{Ca}^{2+}$  in SCR control cells (left), compared to NALCN KD cells (right). Median  $\pm$   
1013 interquartile in SCR Control:  $-0.6 \pm 0.6$  pA/pF, n = 13; NALCN KD:  $-0.13 \pm 0.1$   
1014 pA/pF, n = 13, p < 0.001, Mann Whitney test. Box: inter-quartile, Whiskers:  
1015 range excluding outliers, Central line: median.  
1016  
1017
